# Supplementary material
Source: PubMed Central journal article supplement (PMC8387772)
Supplement: mmc1.pdf [file mmc1.pdf]

Supporting Information for

**Comparative host interactomes of the SARS-CoV-2 nonstructural protein 3 and human coronavirus homologs**

Katherine M. Almasy<sup>1,3,‡</sup>, Jonathan P. Davies<sup>2,3,‡</sup>, Lars Plate<sup>1,2,3,\*</sup>

<sup>1</sup>Department of Chemistry, <sup>2</sup>Department of Biological Sciences, Vanderbilt University, Nashville, TN, USA <sup>3</sup>Vanderbilt Institute for Infection, Immunology, and Inflammation, Vanderbilt University Medical Center, Nashville, TN, USA

‡ contributed equally

\*Corresponding author:

Lars Plate  
Departments of Chemistry and Biological Sciences  
Vanderbilt University  
Nashville, TN 37340  
Email: lars.plate@vanderbilt.edu  
Phone: (615)-343-3405

**TABLE OF CONTENT**

|                                     |            |
|-------------------------------------|------------|
| Figures S1 – S16                    | pp S2-S20  |
| Supporting Datasets: Tables S1 – S8 | p S21      |
| Supporting Information References   | pp S22-S23 |

A nsp3.1

Table of amino acid sequences for nsp3.1 from SARS-CoV-2, hCoV-OC43, and hCoV\_229E. Includes domain labels: Mac1, Ubi1, PL1pro, SUD, and NAB.

B nsp3.2

Table of amino acid sequences for nsp3.2 from SARS-CoV-2, hCoV-OC43, and hCoV\_229E. Includes domain labels: Ubi2, PL2pro, rsm, and TM1.

C nsp3.3

Table of amino acid sequences for nsp3.3 from SARS-CoV-2, hCoV-OC43, and hCoV\_229E. Includes domain labels: 3EctoN, 3EctoC, TM2, AH1, and Y & CoV-Y.

**Figure S1. Multiple-sequence alignment and domain organization of amino acid sequences for nsp3 truncations from different coronavirus strains.**

**A-C.** Amino acid sequences of nsp3.1 (A), nsp3.2 (B), and nsp3.3 (C) homologs were aligned using Clustal Omega. Domain organization is noted by colored boxes<sup>1</sup>.

**A.**

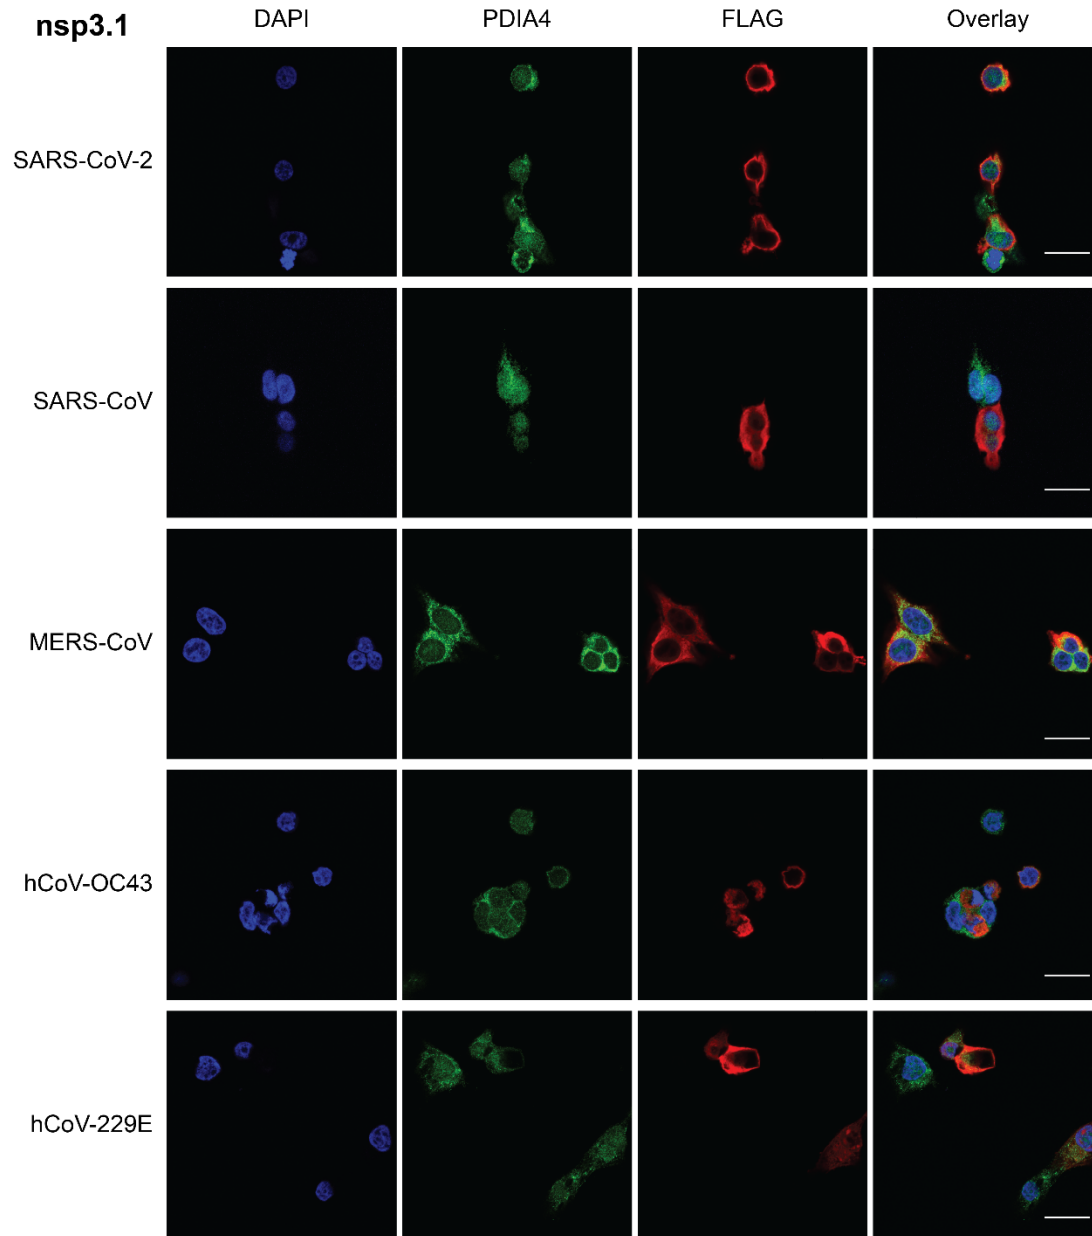

**B.**

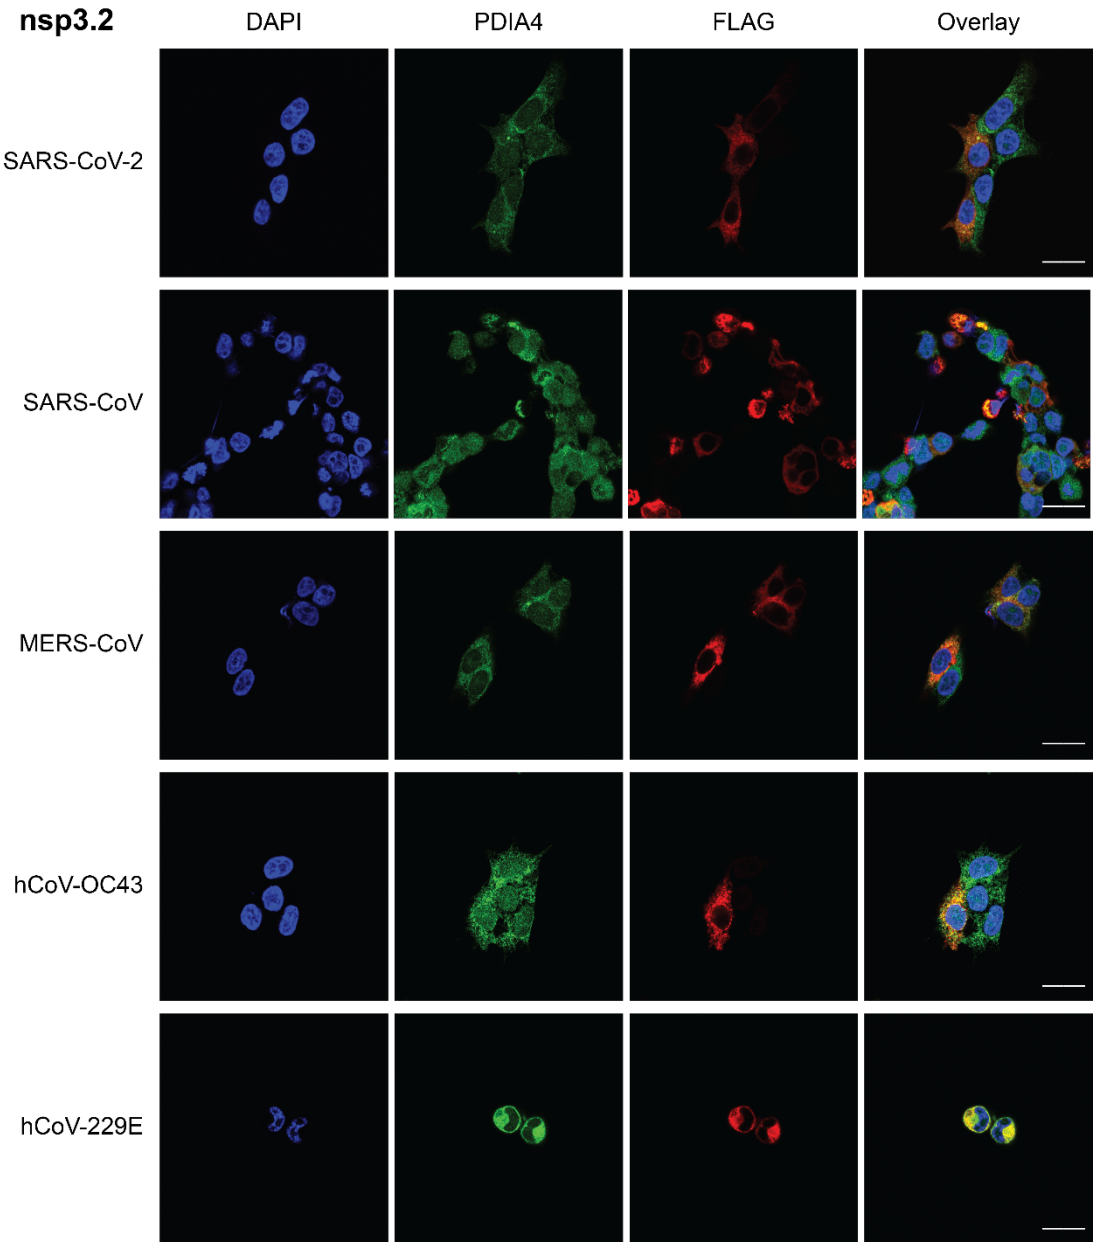

C.

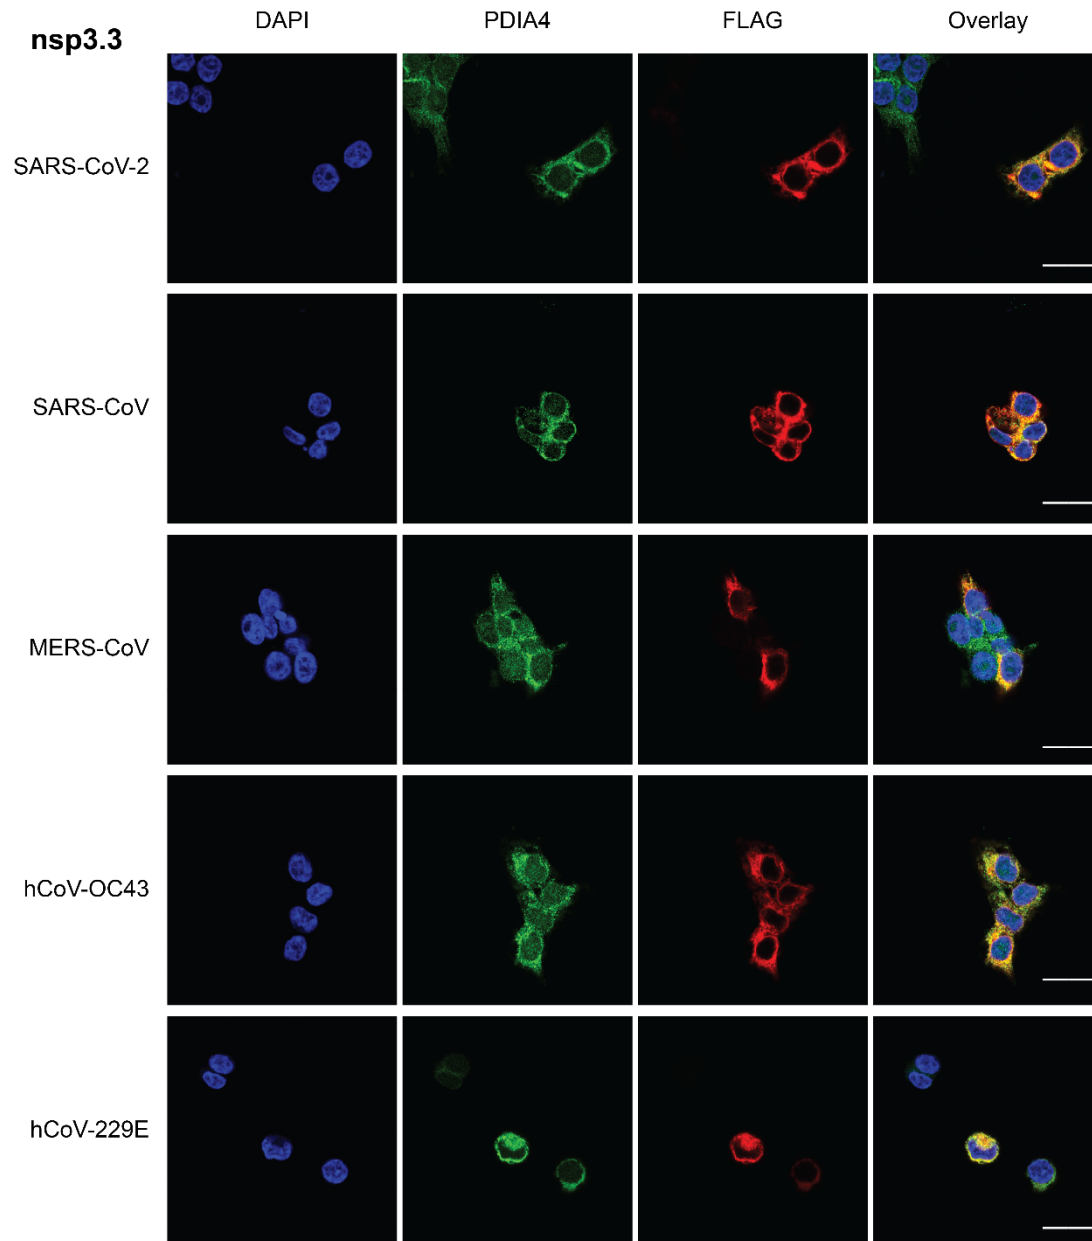

**Figure S2. Immunofluorescence confocal imaging of nsp3 fragments.**

**A.-C.** Colocalization of nsp3 fragment FLAG-tagged homologs (red) with the ER marker, PDIA4 (green), in HEK293T cells. Representative images shown. Scale bar is 20  $\mu\text{m}$ . **(A)** nsp3.1 is predominantly localized diffusely cytosolic. **(B)** nsp3.2 and **(C)** nsp3.3 show greater co-localization with the ER marker PDIA4 confirming ER localization.

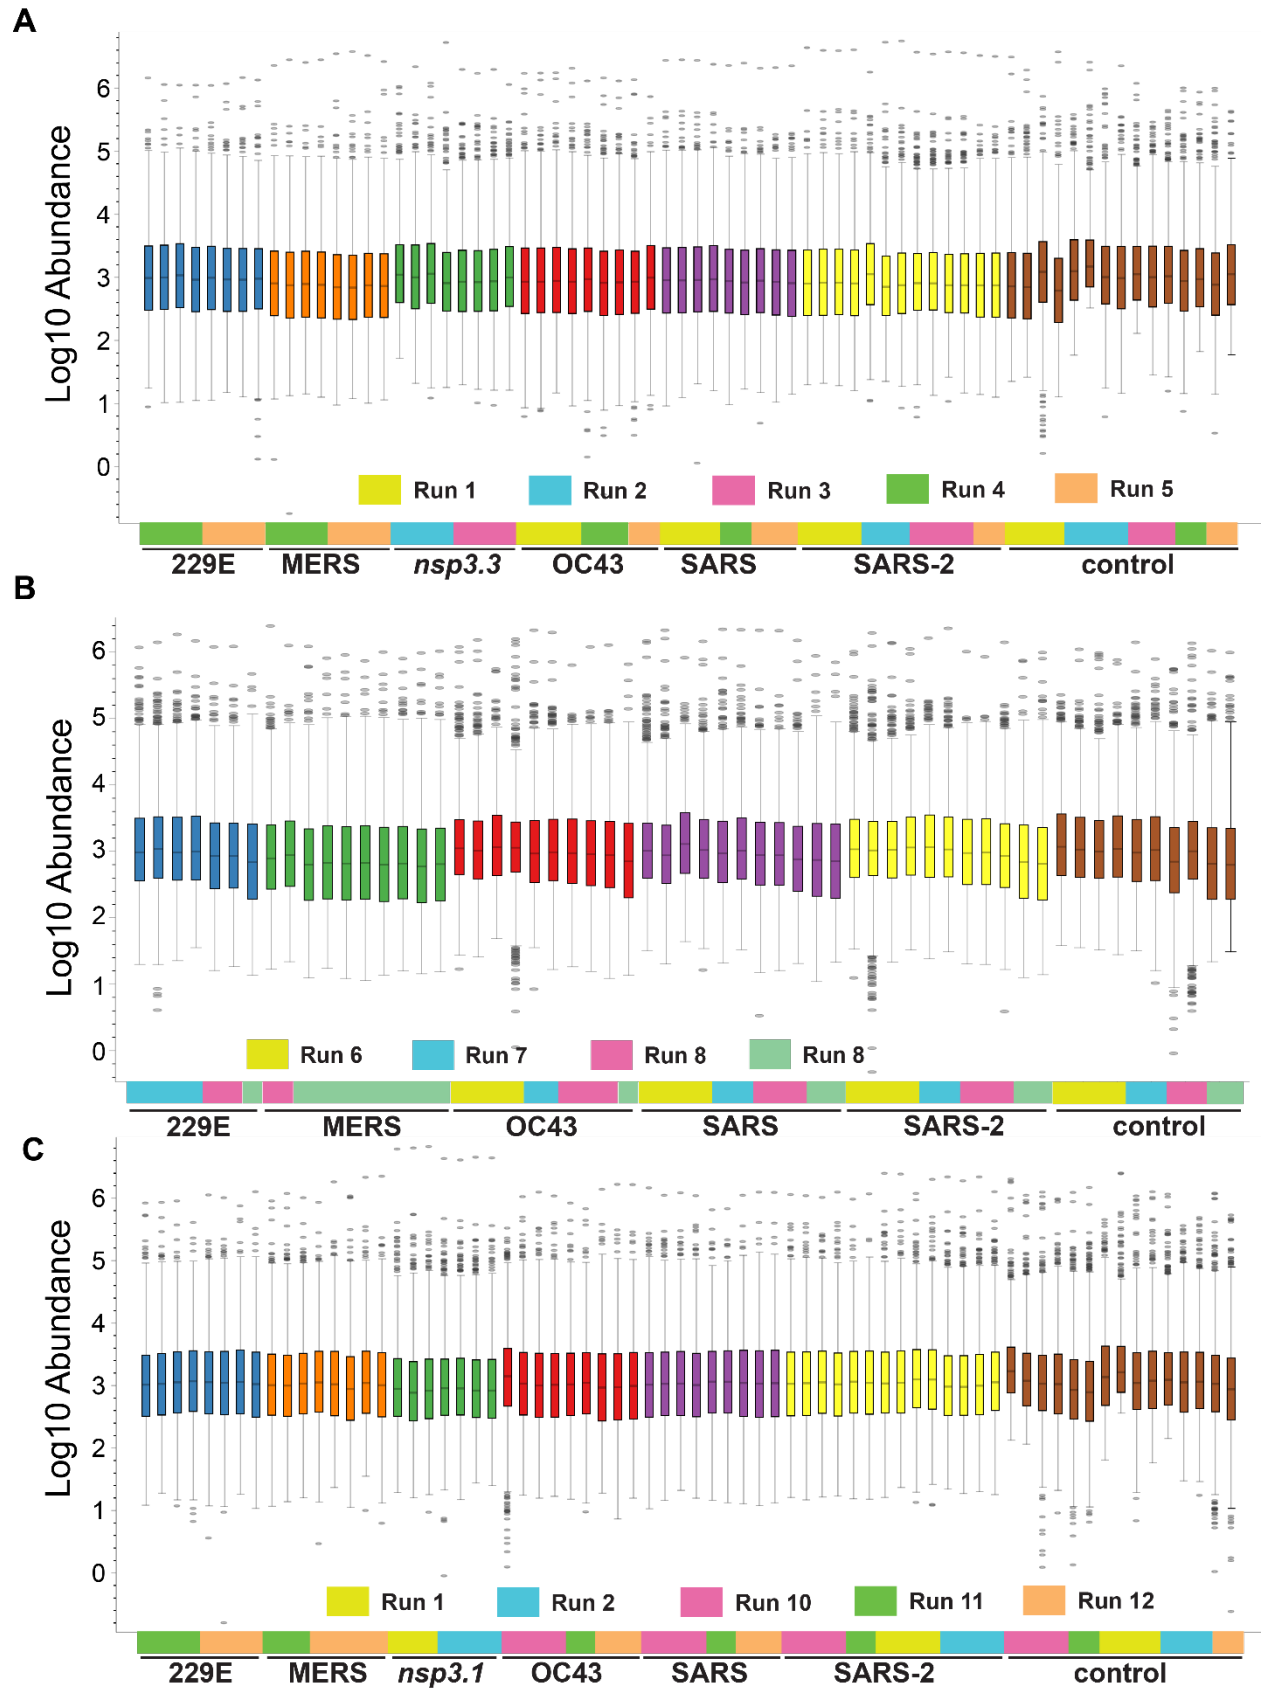

**D**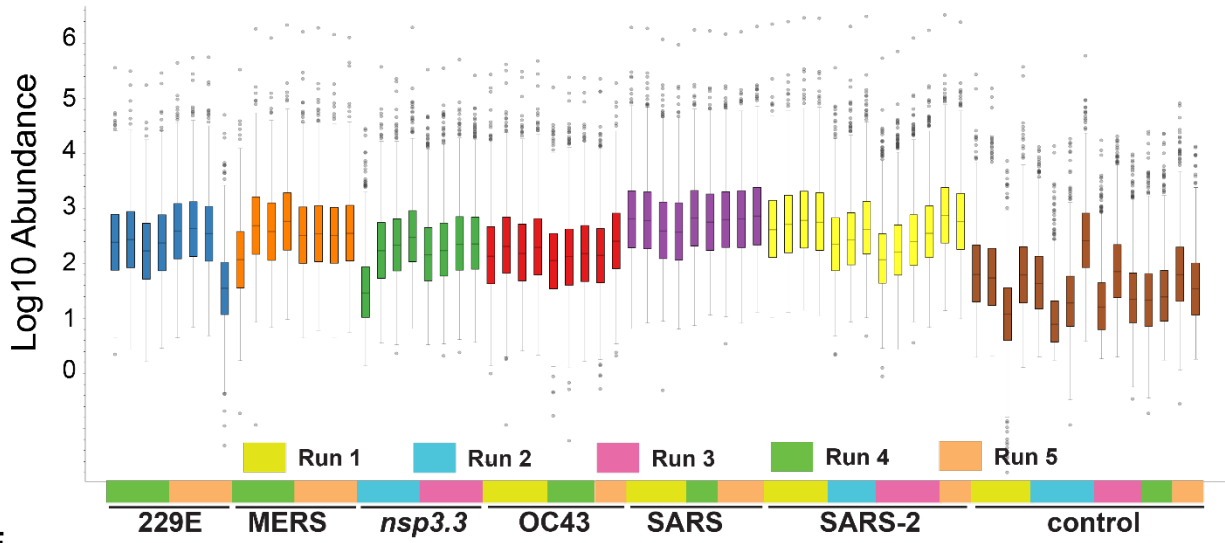**E**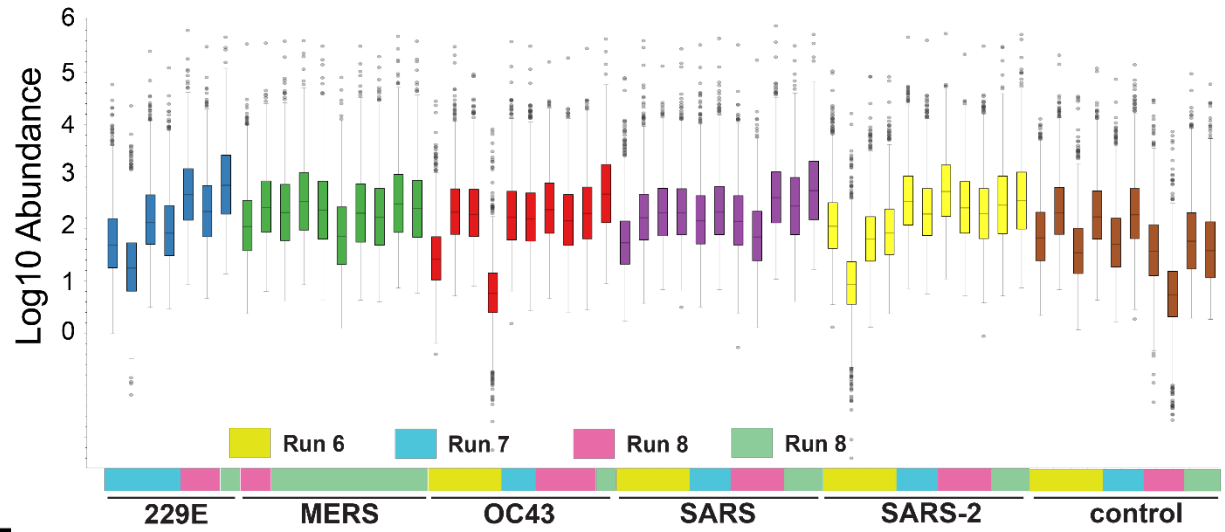**F**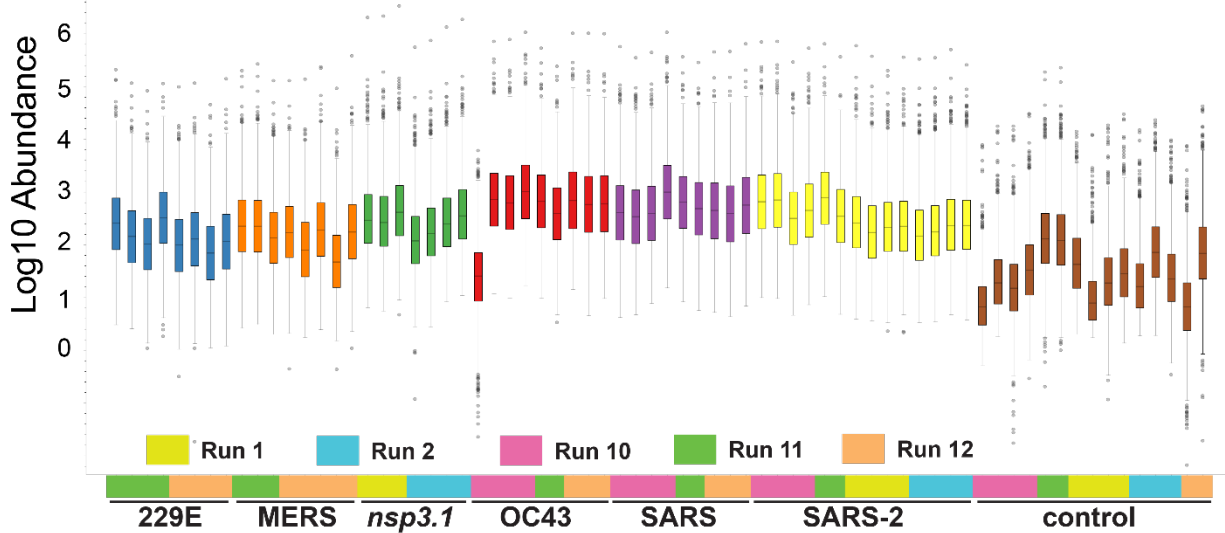

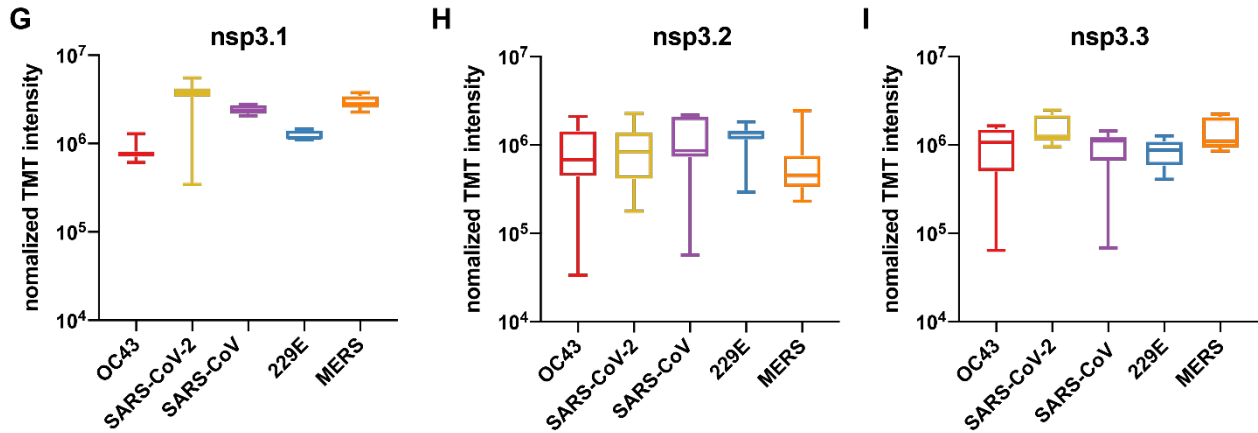

**Figure S3. Nsp3 TMT intensity distribution.**

- A-F.** Box-and-whisker plot of the log<sub>10</sub> TMT intensity abundance of all 11 mass spectrometry runs used in this study. Nsp3 homologs are grouped by same color box-and-whiskers while the identity of the corresponding mass spectrometry run is denoted by colored blocks below. TMT abundances were normalized based on total peptide amounts (**A-C**). See supporting dataset S8 for the layout of samples across TMT channels.
- A,D.** Normalized (**A**) and unnormalized (**D**) TMT abundance distribution for nsp3.1 dataset. Channels denoted “*nsp3.3*” were used for the nsp3.3 dataset within the corresponding mass spectrometry run.
- B,E.** Normalized (**B**) and unnormalized (**E**) TMT abundance distribution for nsp3.2 dataset.
- C,F.** Normalized (**C**) and unnormalized (**F**) TMT abundance distribution for nsp3.3 dataset. Channels denoted “*nsp3.1*” were used for the nsp3.1 dataset within the corresponding mass spectrometry run.
- G-I.** Normalized TMT abundances of nsp3 bait proteins to compare the enrichment of fragments from the different strains. Box and whisker blots represent min. to max. values. (**G**) nsp3.1, (**H**) nsp3.2, (**I**) nsp3.3.



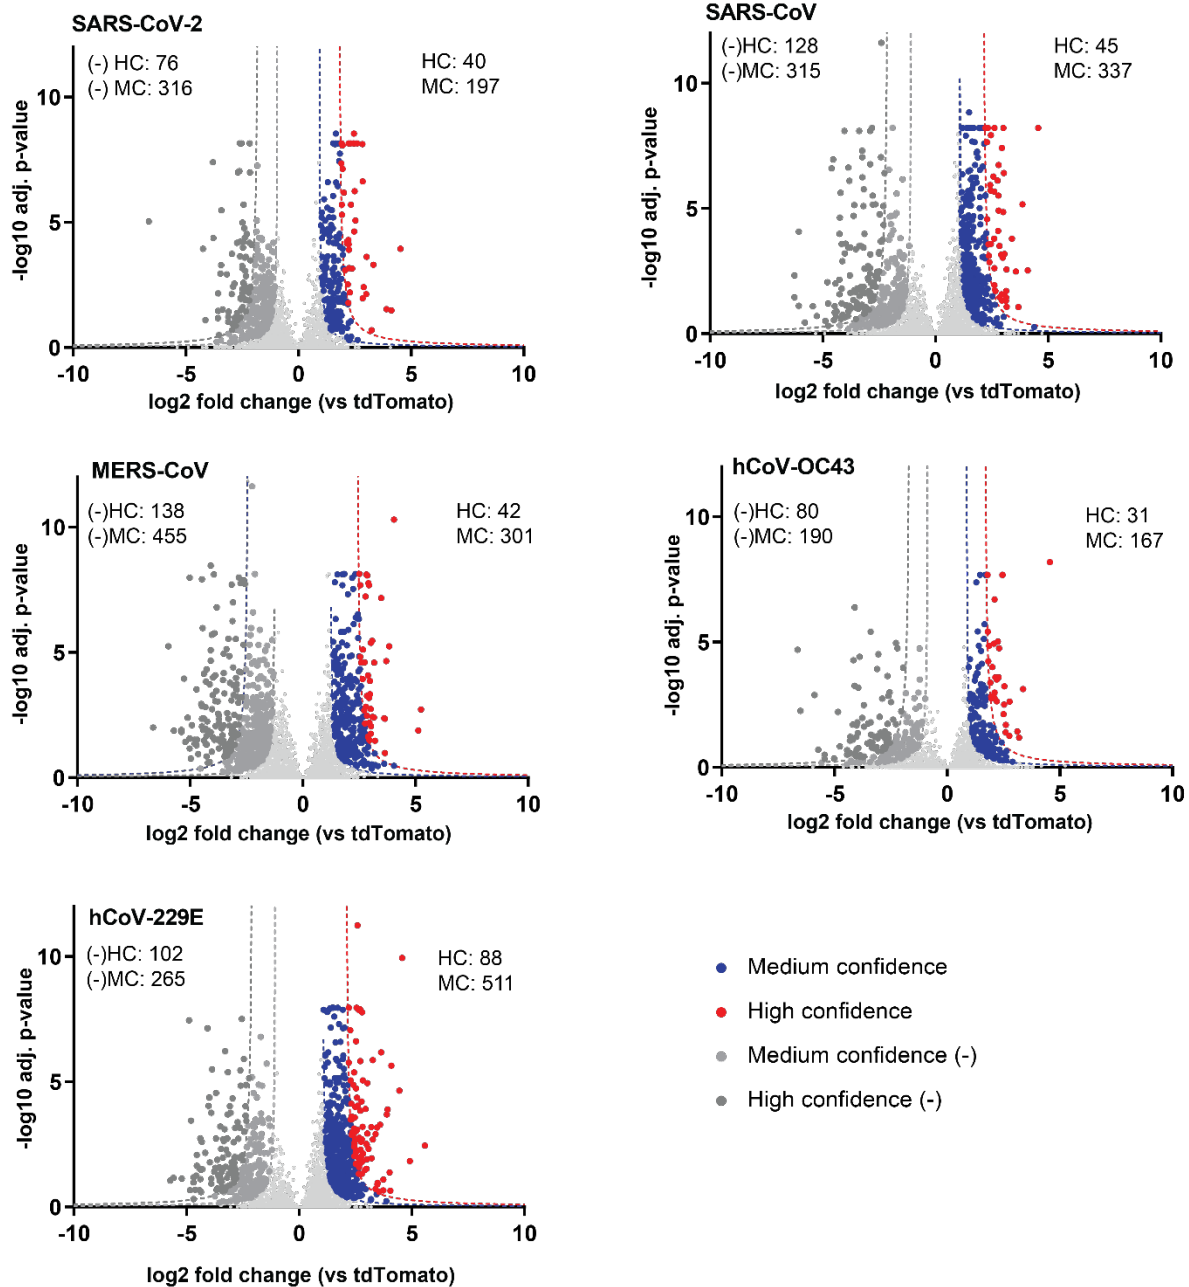

**Figure S4. Volcano plots of nsp3.1 homolog high-confidence interactors enriched vs tdTomato control.**

Host interactors of nsp3.1 homologs were identified by quantitative proteomics and graphed by log<sub>2</sub> fold change compared to tdTomato control and -log<sub>10</sub> adjusted *p*-value (based on ANOVA). Interactors were filtered for medium (blue) and high (red) confidence interactors based on a hyperbolic curve using 1σ (medium-confidence) or 2σ (high-confidence) standard deviations of the histogram of log<sub>2</sub> protein abundance fold changes (refer to “Data analysis” in Methods). Negative medium- and high-confidence (MC, HC) interactors were calculated in a similar manner. Total MC and HC interactors for positive and negative fold change are indicated respectively.

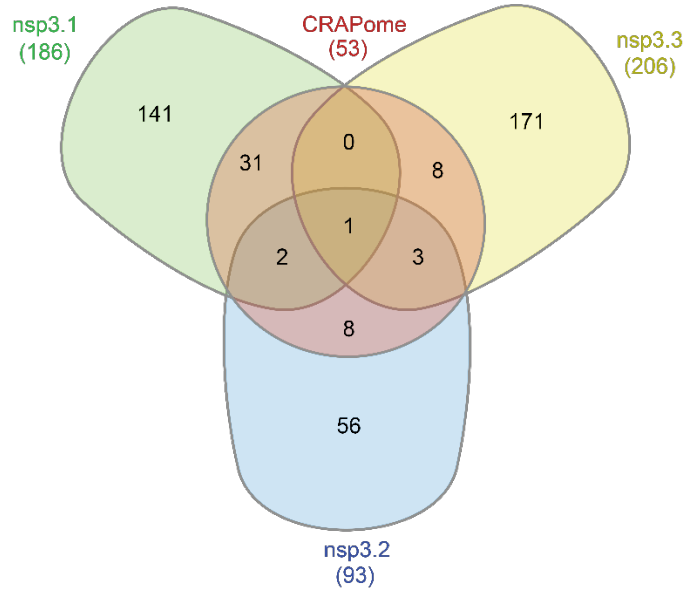

**Figure S5. CRAPome overlap with nsp3.1, nsp3.2, and nsp3.3 homolog high-confidence interactors.** All high-confidence interactors of nsp3 fragments were queried in the CRAPome *Homo sapiens* single step epitope tag AP-MS dataset to identify common contaminant proteins<sup>2</sup>. Interactors with a frequency of 25% or higher in CRAPome control experiments qualified as overlapping with the CRAPome.

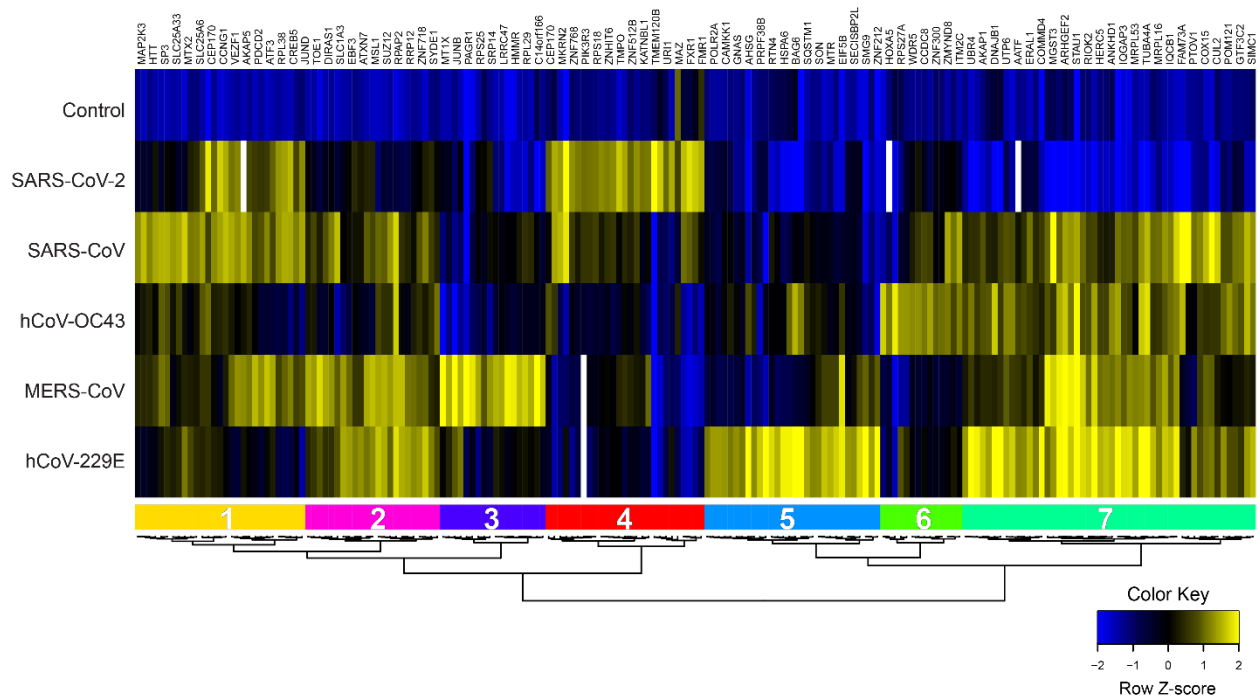

**Figure S6. Comparative heatmap of nsp3.1 high-confidence interactors.** Unbiased hierarchical clustering of log<sub>2</sub> fold change for high-confidence interactors of nsp3.1 homologs yields 7 unique clusters.

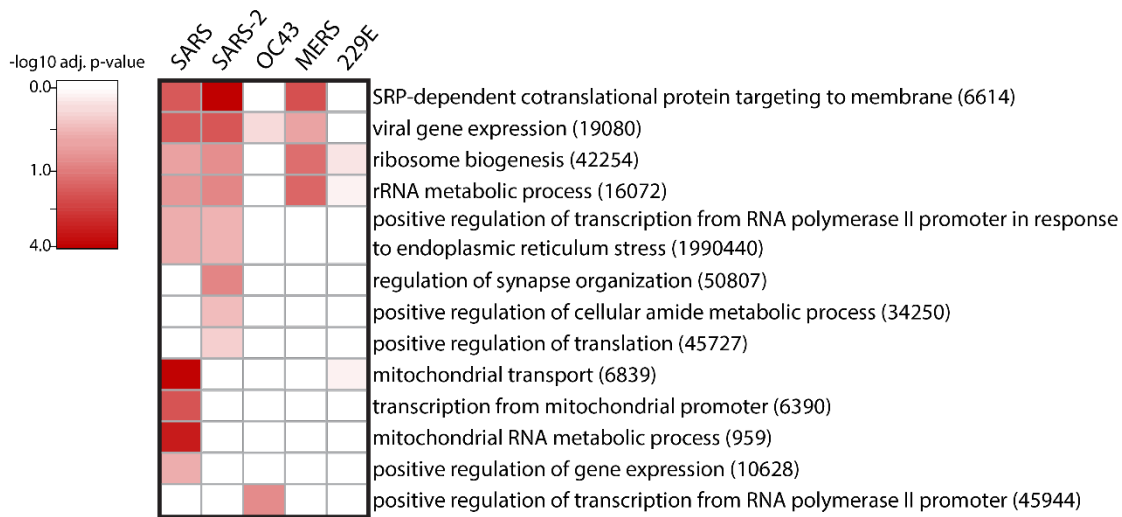

**Figure S7. GO term analysis of nsp3.1 high-confidence interactors.**

Heatmap of gene ontology (GO) term analysis of nsp3.1 high-confidence interactors for enriched biological processes. Selected terms are displayed with corresponding  $-\log_{10}$  adjusted  $p$ -value for each homolog.

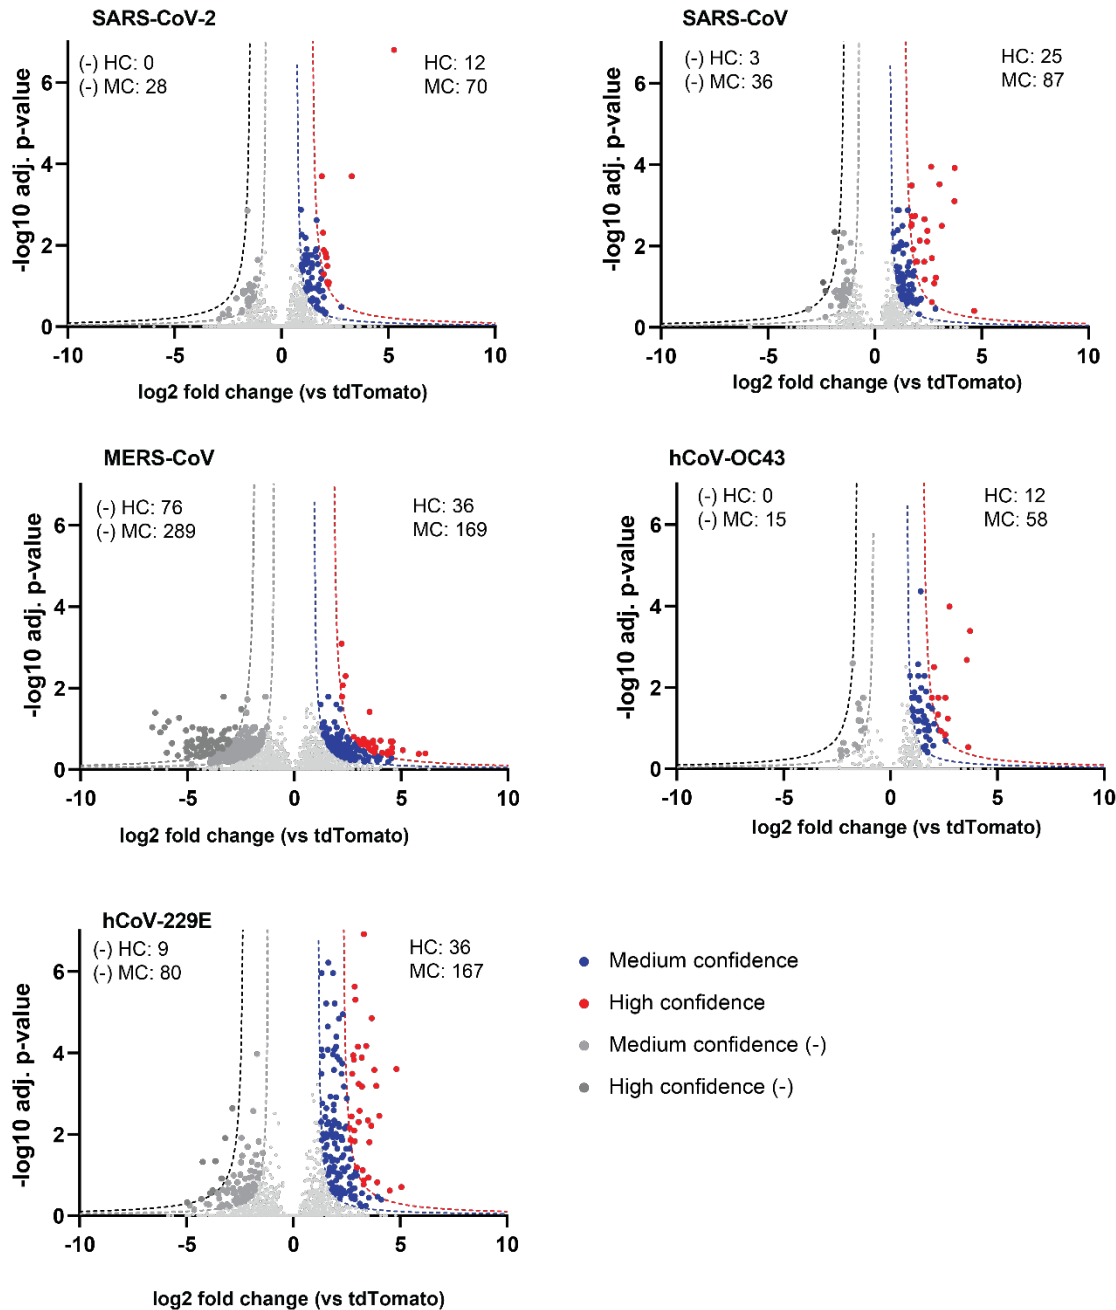

**Figure S8. Volcano plots of nsp3.2 homolog high-confidence interactors enriched vs tdTomato control.**

Host interactors of nsp3.2 homologs were identified by quantitative proteomics and graphed by log<sub>2</sub> fold change compared to tdTomato control and -log<sub>10</sub> adjusted *p*-value (based on ANOVA). Interactors were filtered for medium (blue) and high (red) confidence interactors based on a hyperbolic curve using 1σ (medium-confidence) or 2σ (high-confidence) standard deviations of the histogram of log<sub>2</sub> protein abundance fold changes (refer to “Data analysis” in Methods). Negative medium- and high-confidence (MC, HC) interactors were calculated in a similar manner. Total MC and HC interactors for positive and negative fold change are indicated respectively.

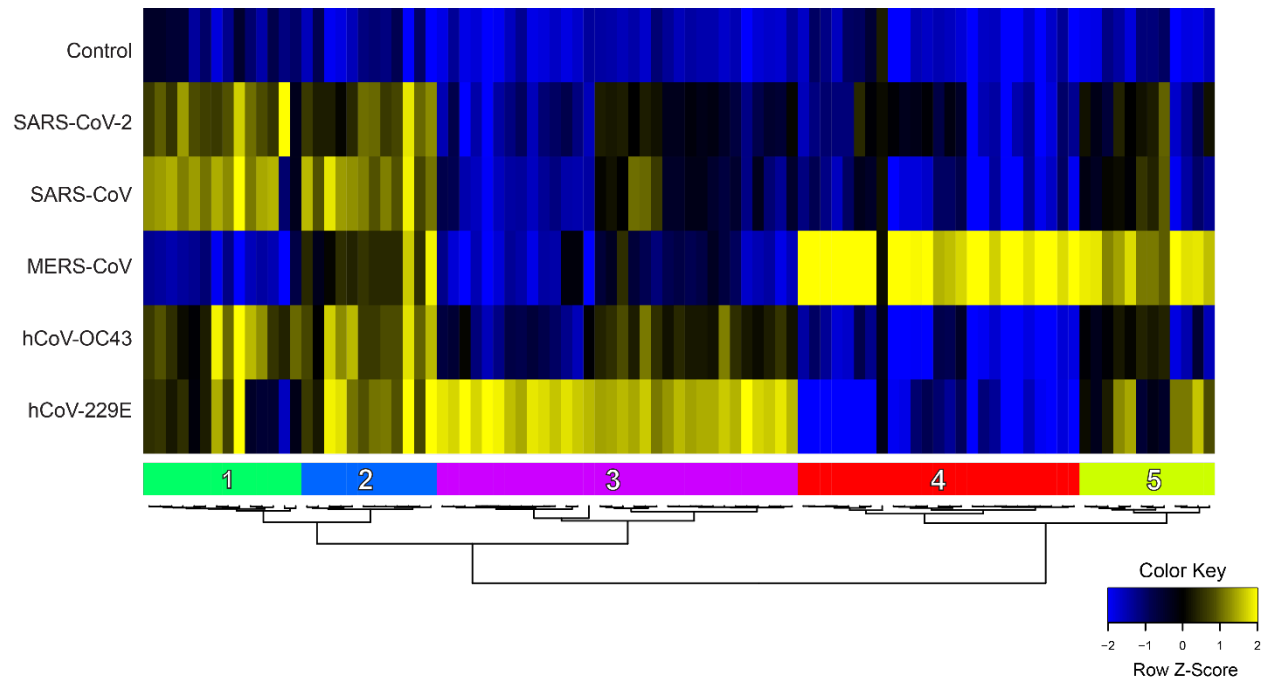

**Figure S9. Comparative heatmap of nsp3.2 high-confidence interactors.**

Unbiased hierarchical clustering of log<sub>2</sub> fold change for high-confidence interactors of nsp3.2 homologs yields 5 unique clusters.

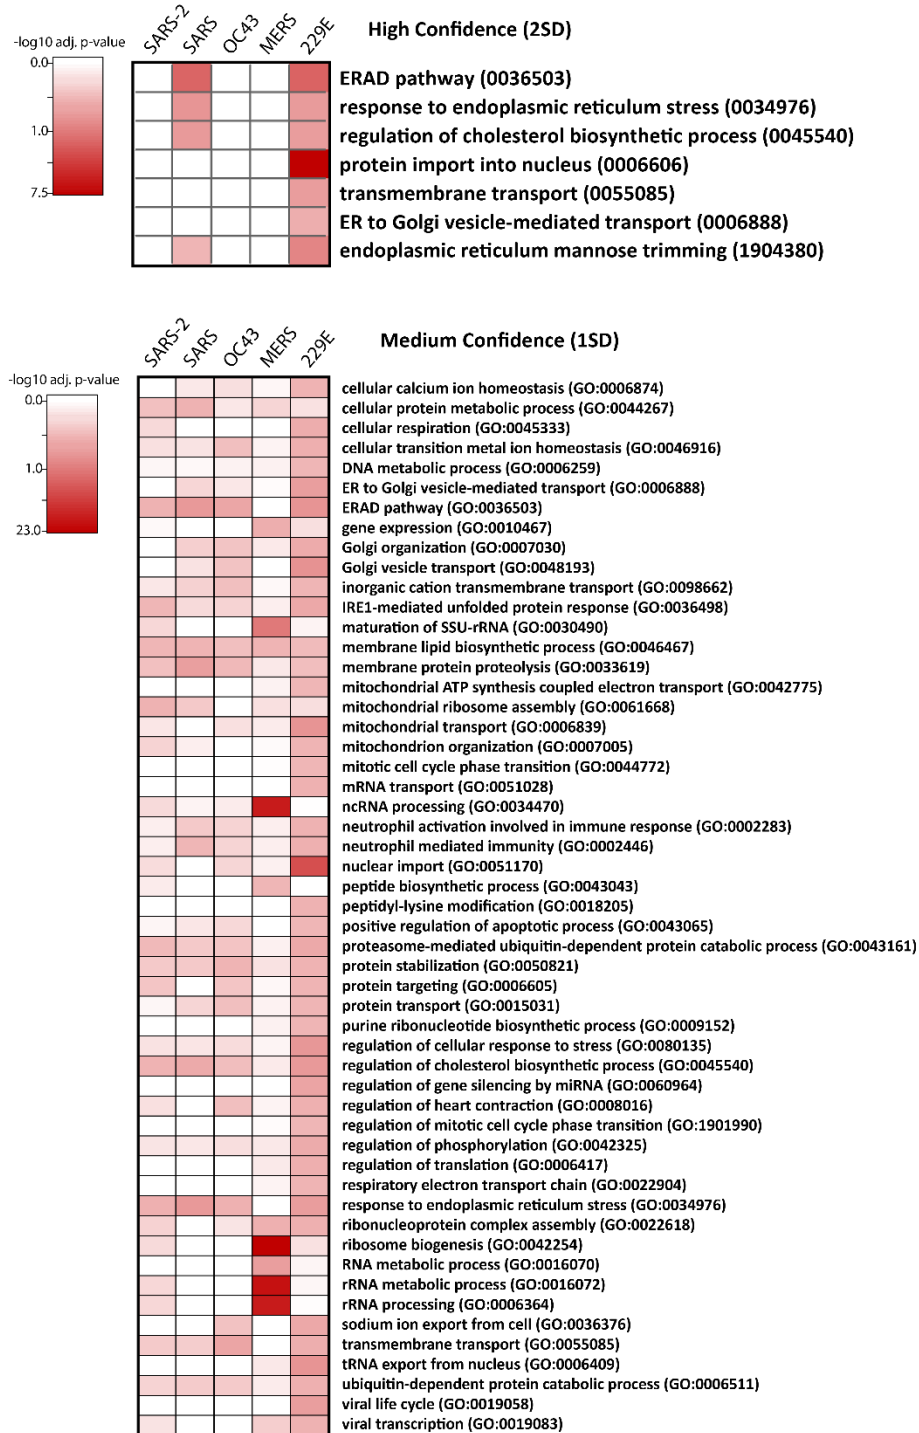

**Figure S10. GO term analysis of nsp3.2 high-confidence interactors.**

Heatmap of gene ontology (GO) term analysis of nsp3.2 high-confidence or medium-confidence interactors for enriched biological processes. Selected terms are displayed with corresponding  $-\log_{10}$  adjusted  $p$ -value for each homolog.

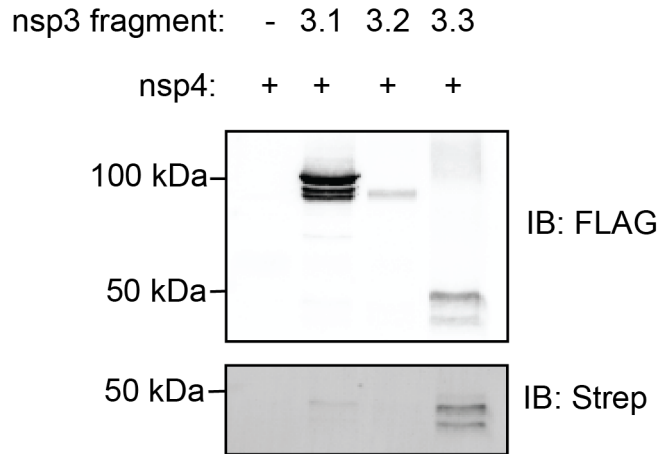

**Figure S11. Nsp3 fragment co-immunoprecipitations with nsp4.**

Samples were co-transfected with 2x-strep tagged SARS-CoV-2 nsp4<sup>3</sup> and individual SARS-CoV-2 FLAG-tagged nsp3 fragments (nsp3.1, nsp3.2, nsp3.3) or tdTomato as a control, respectively. FLAG immunoprecipitations were performed to pull down on nsp3 constructs and immunoblotting was performed with an anti-FLAG antibody to confirm nsp3.3 expression and an FITC anti-Strep antibody to monitor nsp4 co-immunoprecipitation.

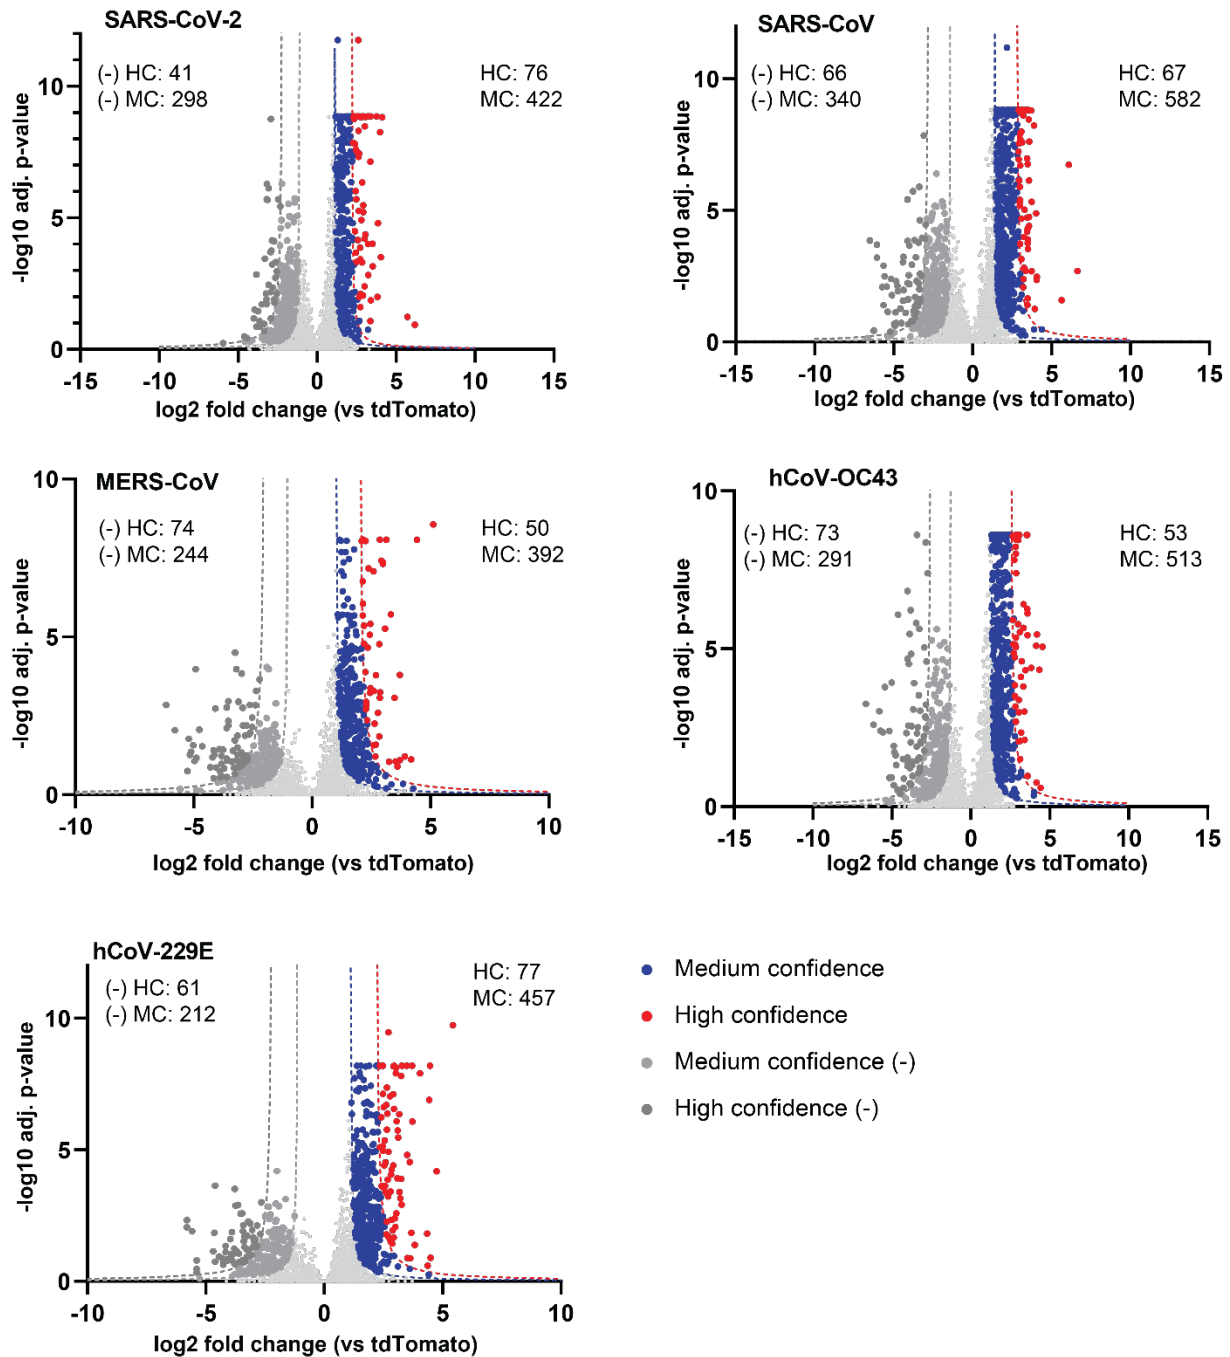

**Figure S12. Volcano plots of nsp3.3 homolog high-confidence interactors enriched vs tdTomato control.**

Host interactors of nsp3.3 homologs were identified by quantitative proteomics and graphed by log<sub>2</sub> fold change compared to tdTomato control and -log<sub>10</sub> adjusted *p*-value (based on ANOVA). Interactors were filtered for medium (blue) and high (red) confidence interactors based on a hyperbolic curve using 1σ (medium-confidence) or 2σ (high-confidence) standard deviations of the histogram of log<sub>2</sub> protein abundance fold changes (refer to “Data analysis” in Methods). Negative medium- and high-confidence (MC, HC) interactors were calculated in a similar manner. Total MC and HC interactors for positive and negative fold change are indicated respectively.



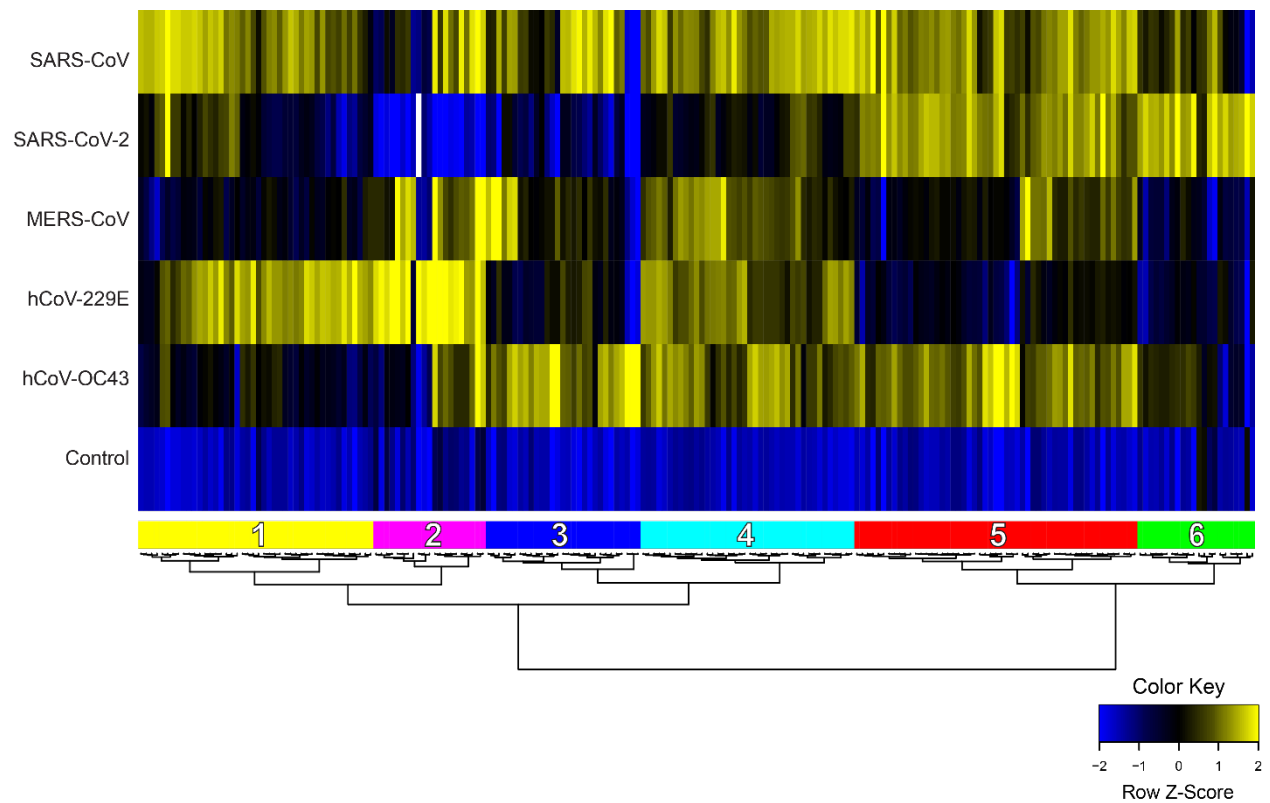

**Figure S13. Comparative heatmap of nsp3.3 high-confidence interactors.**

Unbiased hierarchical clustering of log<sub>2</sub> fold change for high-confidence interactors of nsp3.3 homologs yields 6 unique clusters.

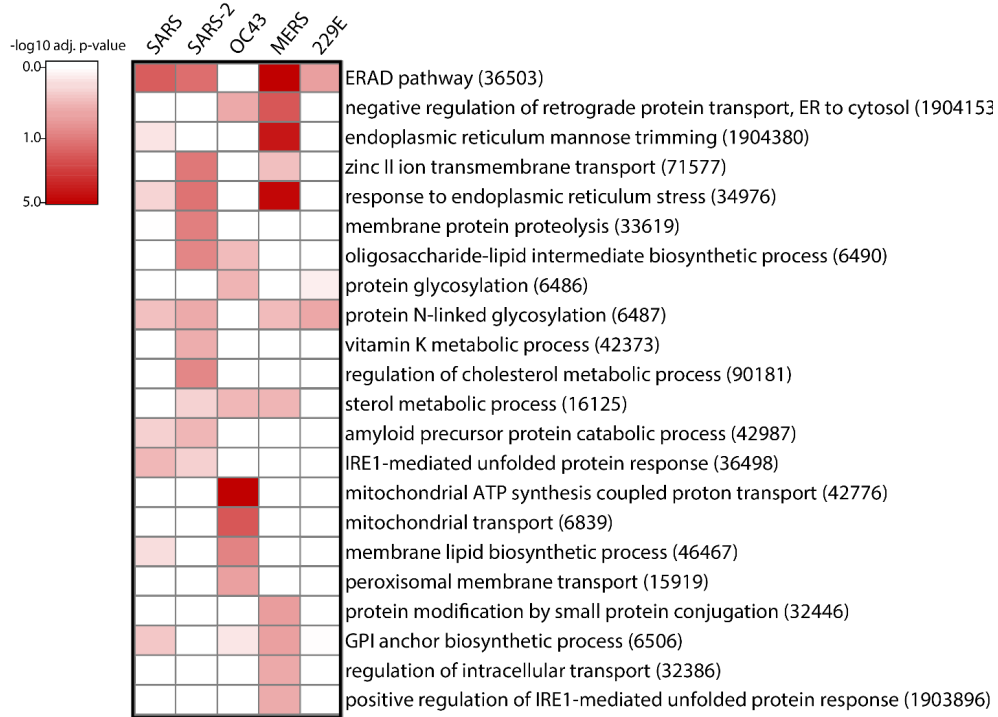

**Figure S14. GO term analysis of nsp3.3 high-confidence interactors.**

Heatmap of gene ontology (GO) term analysis of nsp3.3 high-confidence or medium-confidence interactors for enriched biological processes. Selected terms are displayed with corresponding  $-\log_{10}$  adjusted  $p$ -value for each homolog.

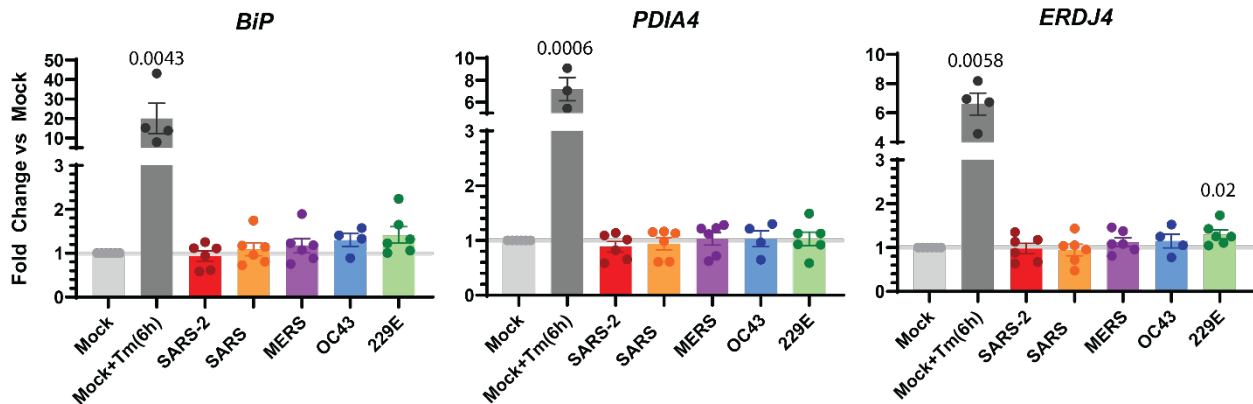

**Figure S15. Effect of nsp3.1 homologs on UPR transcript expression.**

Expression changes of UPR marker transcripts in response to nsp3.1 homolog or mock (tdTomato) transfection measured by reverse transcription qPCR (RT-qPCR). A mock transfected sample was treated with 6  $\mu$ g/mL Tunicamycin (Tm) 6 h pre-harvest to induce general UPR activation as a positive control. *BiP* and *PDIA4* were measured as ATF6 markers, while *ERDJ4* was measured as a IRE1/XBP1s marker. Bars indicate average, error bars indicate SEM. Paired student T-tests were used to test for significance, with  $p$ -values < 0.05 shown. Mock+Tm(6h),  $n = 4$  biological replicates; all other samples,  $n = 6$  biological replicates.

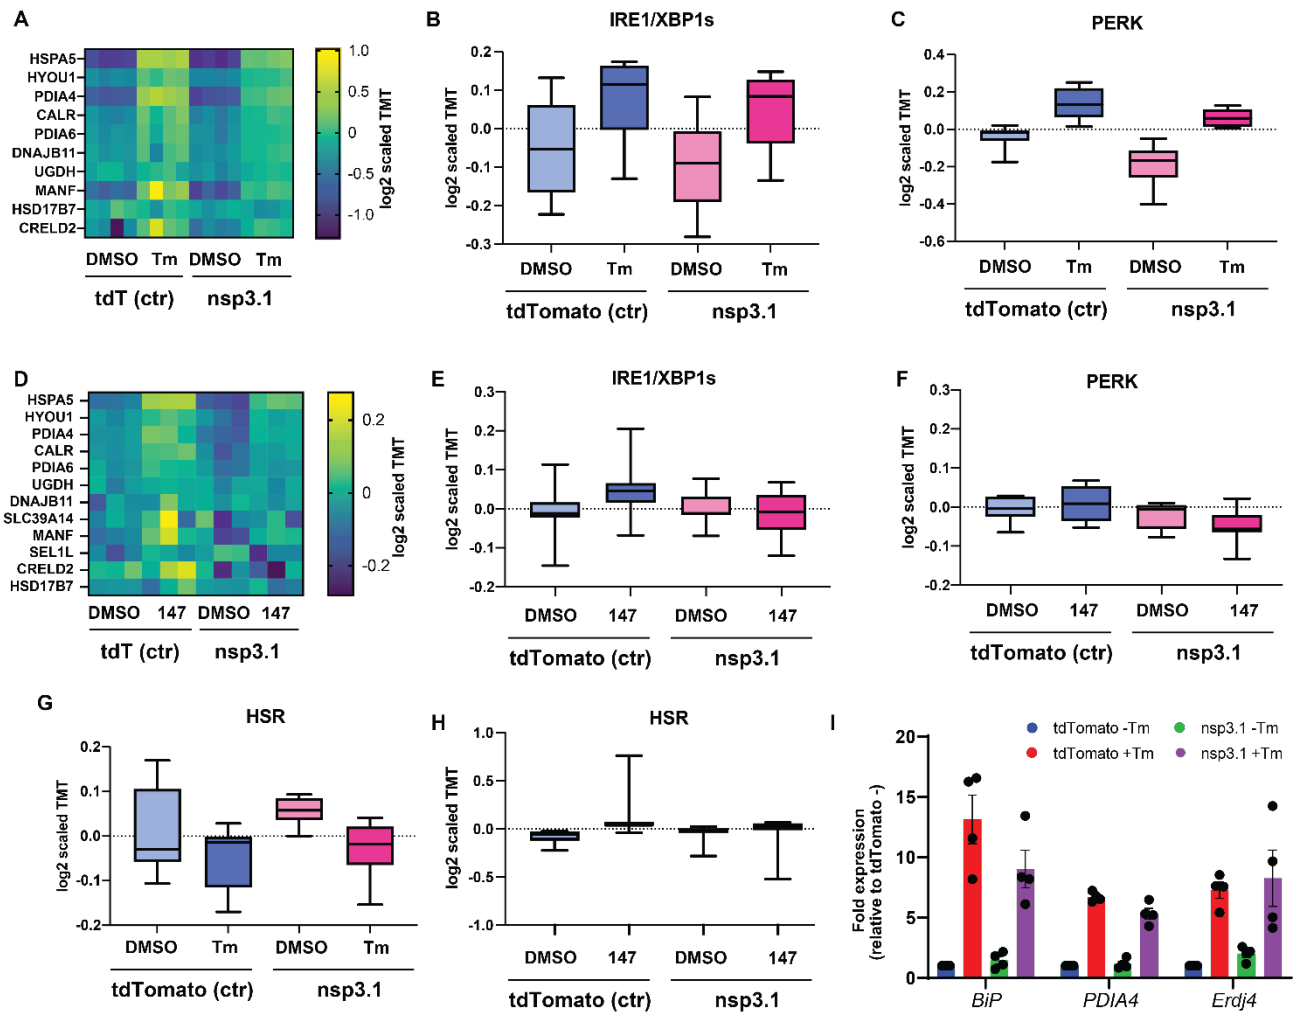

**Figure S16. IRE1, PERK UPR, and HSR activation by SARS-CoV-2 nsp3.1**

**A-C, G.** Heatmap of ATF6 UPR signaling branch protein markers (**A**), box-and-whisker plots showing distribution of protein makers of IRE1/XBP1s (**B**) and PERK (**C**) UPR signaling branches and the cytosolic heat shock response (HSR) pathway (**G**) as measured by quantitative proteomics. HEK293T cells were transfected with tdTomato (control) or SARS-CoV-2 nsp3.1-FT. Samples were treated with DMSO or 6 μg/mL tunicamycin for 16 h pre-harvest. A one-way ANOVA with Geisser-Greenhouse correction and post-hoc Tukey's multiple comparison test was used to determine significance (adjusted  $p$ -values all > 0.05).  $n = 4$  biological replicates in a single mass spectrometry run.

**D-F, H.** Heatmap of ATF6 UPR signaling branch protein markers (**A**) and box-and-whisker plots showing distribution of protein makers of IRE1/XBP1s (**B**) and PERK (**C**) UPR signaling branches and HSR pathway (**H**) as measured by quantitative proteomics. HEK293T cells were transfected with tdTomato (control) or SARS-CoV-2 nsp3.1-FT. Samples were treated with DMSO or 10 μM **147** for 16 h pre-harvest. A one-way ANOVA with Geisser-Greenhouse correction and post-hoc Tukey's multiple comparison test was used to determine significance (adjusted  $p$ -values all > 0.05).  $n = 3$  biological replicates in a single mass spectrometry run.

- I. Expression changes of ATF6 (*BiP*, *PDIA4*) and IRE1/XBP1s (*Erdj4*) markers in response to SARS-CoV-2 nsp3.1 or mock (tdTomato) transfection. Where indicated, tunicamycin (Tm) samples were treated 6 hours prior to harvest. Paired ratio t-tests were used to measure significance ( $n = 4$  biological replicates)

## SUPPORTING DATASETS

(all supporting tables are available as separate Excel files)

**Table S1.** Proteomics data of comparative nsp3.1 interactome profiling. Included are protein identifications, quantifications, abundance ratios, statistical analysis, and filtering of medium- and high-confidence interactors.

**Table S2.** List of peptide identifications, quantifications, and protein mapping for comparative nsp3.1 interactome profiling.

**Table S3.** Proteomics data of comparative nsp3.2 interactome profiling. Included are protein identifications, quantifications, abundance ratios, statistical analysis, and filtering of medium- and high-confidence interactors.

**Table S4.** List of peptide identifications, quantifications, and protein mapping for comparative nsp3.2 interactome profiling.

**Table S5.** Proteomics data of comparative nsp3.3 interactome profiling. Included are protein identifications, quantifications, abundance ratios, statistical analysis, and filtering of medium- and high-confidence interactors.

**Table S6.** List of peptide identifications, quantifications, and protein mapping for comparative nsp3.3 interactome profiling.

**Table S7.** Global proteomics data of nsp3.1 modulation of the UPR and associated pathways. Included are protein identifications, quantifications, abundance ratios, statistical analysis, and filtering of UPR and related pathway markers.

**Table S8.** TMT channel organization for all quantitative proteomics experiments.

## SUPPORTING INFORMATION REFERENCES

- (1) Lei, J.; Kusov, Y.; Hilgenfeld, R. Nsp3 of Coronaviruses: Structures and Functions of a Large Multi-Domain Protein. *Antiviral Research*. Elsevier B.V. January 1, 2018, pp 58–74. <https://doi.org/10.1016/j.antiviral.2017.11.001>.
- (2) Mellacheruvu, D.; Wright, Z.; Couzens, A. L.; Lambert, J. P.; St-Denis, N. A.; Li, T.; Miteva, Y. V.; Hauri, S.; Sardi, M. E.; Low, T. Y.; Halim, V. A.; Bagshaw, R. D.; Hubner, N. C.; Al-Hakim, A.; Bouchard, A.; Faubert, D.; Fermin, D.; Dunham, W. H.; Goudreault, M.; Lin, Z. Y.; Badillo, B. G.; Pawson, T.; Durocher, D.; Coulombe, B.; Aebersold, R.; Superti-Furga, G.; Colinge, J.; Heck, A. J. R.; Choi, H.; Gstaiger, M.; Mohammed, S.; Cristea, I. M.; Bennett, K. L.; Washburn, M. P.; Raught, B.; Ewing, R. M.; Gingras, A. C.; Nesvizhskii, A. I. The CRAPome: A Contaminant Repository for Affinity Purification-Mass Spectrometry Data. *Nat. Methods* **2013**, *10* (8), 730–736. <https://doi.org/10.1038/nmeth.2557>.
- (3) Gordon, D. E.; Jang, G. M.; Bouhaddou, M.; Xu, J.; Obernier, K.; White, K. M.; O’Meara, M. J.; Rezelj, V. V.; Guo, J. Z.; Swaney, D. L.; Tummino, T. A.; Hüttenhain, R.; Kaake, R. M.; Richards, A. L.; Tutuncuoglu, B.; Foussard, H.; Batra, J.; Haas, K.; Modak, M.; Kim, M.; Haas, P.; Polacco, B. J.; Braberg, H.; Fabius, J. M.; Eckhardt, M.; Soucheray, M.; Bennett, M. J.; Cakir, M.; McGregor, M. J.; Li, Q.; Meyer, B.; Roesch, F.; Vallet, T.; Mac Kain, A.; Miorin, L.; Moreno, E.; Naing, Z. Z. C.; Zhou, Y.; Peng, S.; Shi, Y.; Zhang, Z.; Shen, W.; Kirby, I. T.; Melnyk, J. E.; Chorba, J. S.; Lou, K.; Dai, S. A.; Barrio-Hernandez, I.; Memon, D.; Hernandez-Armenta, C.; Lyu, J.; Mathy, C. J. P.; Perica, T.; Pilla, K. B.; Ganesan, S. J.; Saltzberg, D. J.; Rakesh, R.; Liu, X.; Rosenthal, S. B.; Calviello, L.; Venkataramanan, S.; Liboy-Lugo, J.; Lin, Y.; Huang, X. P.; Liu, Y. F.; Wankowicz, S. A.; Bohn, M.; Safari, M.; Ugur, F. S.; Koh, C.; Savar, N. S.; Tran, Q. D.; Shengjuler, D.; Fletcher, S. J.; O’Neal, M. C.; Cai, Y.; Chang, J. C. J.; Broadhurst, D. J.; Klippsten, S.;

Sharp, P. P.; Wenzell, N. A.; Kuzuoglu-Ozturk, D.; Wang, H. Y.; Trenker, R.; Young, J. M.; Caverio, D. A.; Hiatt, J.; Roth, T. L.; Rathore, U.; Subramanian, A.; Noack, J.; Hubert, M.; Stroud, R. M.; Frankel, A. D.; Rosenberg, O. S.; Verba, K. A.; Agard, D. A.; Ott, M.; Emerman, M.; Jura, N.; von Zastrow, M.; Verdin, E.; Ashworth, A.; Schwartz, O.; d'Enfert, C.; Mukherjee, S.; Jacobson, M.; Malik, H. S.; Fujimori, D. G.; Ideker, T.; Craik, C. S.; Floor, S. N.; Fraser, J. S.; Gross, J. D.; Sali, A.; Roth, B. L.; Ruggero, D.; Taunton, J.; Kortemme, T.; Beltrao, P.; Vignuzzi, M.; García-Sastre, A.; Shokat, K. M.; Shoichet, B. K.; Krogan, N. J. A SARS-CoV-2 Protein Interaction Map Reveals Targets for Drug Repurposing. *Nature* **2020**, *583* (7816), 459–468. <https://doi.org/10.1038/s41586-020-2286-9>.
